# Supplementary material
Source: ML conference proceedings conference paper supplement (https://proceedings.mlr.press/v81/buolamwini18a.html)
Supplement: Supplementary file [file buolamwini18a-supp.pdf]

# Gender Shades: Intersectional Accuracy Disparities in Commercial Gender Classification Supplementary Materials

**Joy Buolamwini**

*MIT Media Lab 75 Amherst St. Cambridge, MA 02139*

JOYAB@MIT.EDU

**Timnit Gebru**

*Microsoft Research 641 Avenue of the Americas, New York, NY 10011*

TIMNIT.GEBRU@MICROSOFT.COM

**Editors:** Sorelle A. Friedler and Christo Wilson

|                  | All | Female | Male  | Darker | Lighter | DF    | DM    | LF    | LM   |
|------------------|-----|--------|-------|--------|---------|-------|-------|-------|------|
| <b>MSFT</b>      |     |        |       |        |         |       |       |       |      |
| Error Proportion | -   | 76.9%  | 23.1% | 93.6%  | 6.4%    | 70.5% | 23.1% | 6.4%  | 0.0% |
| Error Count      | 78  | 60     | 18    | 73     | 5       | 55    | 18    | 5     | 0    |
| <b>FACE++</b>    |     |        |       |        |         |       |       |       |      |
| Error Proportion | -   | 95.9%  | 4.1%  | 74.0%  | 26.0%   | 72.4% | 1.6%  | 23.6% | 2.4% |
| Error Count      | 123 | 118    | 5     | 91     | 32      | 89    | 2     | 29    | 3    |
| <b>IBM</b>       |     |        |       |        |         |       |       |       |      |
| Error Proportion | -   | 74.7%  | 25.3% | 85.7%  | 14.3%   | 61.0% | 24.7% | 13.6% | 0.6% |
| Error Count      | 154 | 115    | 39    | 132    | 22      | 94    | 38    | 21    | 1    |

Table 1: The error proportion and count contribution of each subgroup to the overall error rates for the 3 evaluated commercial classifiers.

GENDER SHADES

| Classifier    | Gender | Skin Type | $n$ | UC | PPV(%) | FPR(%) | TPR(%) | Error Rate(%) |
|---------------|--------|-----------|-----|----|--------|--------|--------|---------------|
| <b>MSFT</b>   | Female | I         | 59  | 1  | 100    | 0.0    | 98.3   | 1.7           |
|               |        | II        | 176 | 0  | 100    | 0.0    | 98.9   | 1.1           |
|               |        | III       | 61  | 0  | 100    | 0.0    | 96.7   | 3.3           |
|               |        | IV        | 36  | 1  | 100    | 0.0    | 100    | 0.0           |
|               |        | V         | 141 | 3  | 94.6   | 4.7    | 76.8   | 23.2          |
|               |        | VI        | 94  | 2  | 85.2   | 8.3    | 75.0   | 25.0          |
|               | Male   | I         | 54  | 0  | 98.2   | 1.7    | 100    | 0.0           |
|               |        | II        | 263 | 0  | 99.2   | 1.1    | 100    | 0.0           |
|               |        | III       | 68  | 0  | 97.1   | 3.3    | 100    | 0.0           |
|               |        | IV        | 29  | 0  | 100    | 0.0    | 100    | 0.0           |
|               |        | V         | 129 | 2  | 79.1   | 23.2   | 95.3   | 4.7           |
|               |        | VI        | 160 | 16 | 85.2   | 25.0   | 91.7   | 8.3           |
| <b>FACE++</b> | Female | I         | 59  | 0  | 96.3   | 3.7    | 88.1   | 11.9          |
|               |        | II        | 176 | 0  | 99.4   | 0.4    | 90.3   | 9.7           |
|               |        | III       | 61  | 0  | 100    | 0.0    | 91.8   | 8.2           |
|               |        | IV        | 36  | 0  | 100    | 0.0    | 86.1   | 13.9          |
|               |        | V         | 141 | 5  | 97.9   | 1.6    | 67.6   | 32.4          |
|               |        | VI        | 94  | 8  | 100    | 0.0    | 53.5   | 46.5          |
|               | Male   | I         | 54  | 0  | 88.1   | 11.9   | 96.3   | 3.7           |
|               |        | II        | 263 | 1  | 93.9   | 9.7    | 99.6   | 0.4           |
|               |        | III       | 68  | 0  | 93.2   | 8.2    | 100    | 0.0           |
|               |        | IV        | 29  | 0  | 85.3   | 13.9   | 100    | 0.0           |
|               |        | V         | 129 | 1  | 74.1   | 32.4   | 98.4   | 1.6           |
|               |        | VI        | 160 | 24 | 77.3   | 46.5   | 100    | 0.0           |
| <b>IBM</b>    | Female | I         | 59  | 0  | 100    | 0.0    | 94.9   | 5.1           |
|               |        | II        | 176 | 0  | 99.4   | 0.4    | 92.6   | 7.4           |
|               |        | III       | 61  | 0  | 100    | 0.0    | 91.8   | 8.2           |
|               |        | IV        | 36  | 0  | 100    | 0.0    | 91.7   | 8.3           |
|               |        | V         | 141 | 0  | 96.9   | 2.3    | 66.7   | 33.3          |
|               |        | VI        | 94  | 0  | 58.8   | 21.9   | 53.2   | 46.8          |
|               | Male   | I         | 54  | 0  | 94.7   | 5.1    | 100    | 0.0           |
|               |        | II        | 263 | 1  | 95.3   | 7.4    | 99.6   | 0.4           |
|               |        | III       | 68  | 0  | 93.2   | 8.2    | 100    | 0.0           |
|               |        | IV        | 29  | 0  | 90.6   | 8.3    | 100    | 0.0           |
|               |        | V         | 129 | 1  | 72.7   | 33.3   | 97.7   | 2.3           |
|               |        | VI        | 160 | 0  | 74.0   | 46.8   | 78.1   | 21.9          |

Table 2: Disaggregated Intersectional Performance Results by Gender and Fitzpatrick Skin Type. UC = Undetected Count, TPR = True Positive Rate, FPR = False Positive Rate, PPV = Positive Predictive Value, Error Rate = 1 - TPR.
